# Supplementary material
Source: PubMed Central journal article supplement (PMC4023781)
Supplement: AAC.02658-13_zac004142772so1.pdf [file AAC.02658-13_zac004142772so1.pdf]

1 **Appendix**

2 Table A1: Proportion of C3HeB/FeJ mice with culture-negative lungs on TCH-containing  
3 media

| Regimen   | W-6 | D0  | W4  | W8  |
|-----------|-----|-----|-----|-----|
| Untreated | 0/4 | 1/3 | 0/5 | 0/5 |
| INH       |     |     | 0/6 | 0/6 |
| RIF       |     |     | 0/6 | 1/6 |
| LFX       |     |     | 0/6 | 0/5 |
| TMC       |     |     | 0/6 | 0/6 |
| Pa        |     |     | 0/6 | 0/6 |
| PNU       |     |     | 0/6 | 0/6 |
| TMC-LFX   |     |     | 0/6 | 4/6 |
| TMC-Pa    |     |     | 0/6 | 3/6 |
| TMC-PNU   |     |     | 0/6 | 0/6 |

4 Legend: W-6 corresponds to the day of *M. tuberculosis* challenge, D0 to the start of  
5 treatment. INH=isoniazid; RIF=rifampicin; LFX=levofloxacin; MFX=moxifloxacin;  
6 TMC=bedaquiline; Pa=PA-824; PNU=sutezolid

7
